# Supplementary material for: Screening of Morphophysiological, Anatomical, and Ultrastructural Traits to Improve the Elite Genotype Selection in Sugarcane (Saccharum officinarum L.)
Source: MDPI journal article supplement (doi:10.3390/horticulturae8111069), 2022-11-14
Supplement: s1 [file s1]

**Supplementary S2.** Plasticity index (PI) of physiological, biochemical, morphological and ultrastructural features measured in four varieties (RB92579, RB867515, RB855536, and RB72454) of sugarcane. Numbers in bold denote the mean ( $\pm$  SE).

| Features                                   | Major value   | Minor value | PI   |
|--------------------------------------------|---------------|-------------|------|
| Physiological features                     |               |             |      |
| Net photosynthesis ( $P_N$ )               | 25.64         | 2.37        | 0.91 |
| Stomatal conductance ( $g_s$ )             | 199.93        | 91.10       | 0.54 |
| Transpiration (E)                          | 3.13          | 0.61        | 0.81 |
| Intrinsic water use efficiency ( $WUE_i$ ) | 177.91        | 54.15       | 0.70 |
| C <sub>i</sub> /C <sub>a</sub> ratio       | 0.69          | 0.18        | 0.74 |
| Leaf temperature                           | 33.55         | 26.48       | 0.21 |
| Vapour pressure deficit                    | 2.20          | 0.99        | 0.55 |
| Leaf hydraulic conductance                 | 244.15        | 21.85       | 0.91 |
| F <sub>v</sub> /F <sub>m</sub>             | 0.82          | 0.53        | 0.35 |
| Φ <sub>PSII</sub>                          | 0.73          | 0.11        | 0.85 |
| ETR                                        | 396.74        | 12.39       | 0.97 |
| ETR/P <sub>N</sub>                         | 23.33         | 3.40        | 0.85 |
| Mean value                                 | 0.70 ± 0.07 a |             |      |
| Biochemical features                       |               |             |      |
| Chlorophyll a                              | 3.09          | 0.55        | 0.82 |
| Chlorophyll b                              | 0.82          | 0.11        | 0.86 |
| Chlorophyll a + b                          | 3.72          | 0.78        | 0.79 |
| Total Carotenoids                          | 1.23          | 0.22        | 0.82 |
| Carotenoids / Chl a + b                    | 0.84          | 0.14        | 0.83 |
| Chl a + b / Carotenoids                    | 6.95          | 1.19        | 0.83 |
| Amino acids                                | 23.29         | 7.64        | 0.67 |
| Total Proteins                             | 166.51        | 36.37       | 0.78 |
| SOD activity                               | 36.63         | 9.20        | 0.75 |
| CAT activity                               | 42.22         | 13.45       | 0.68 |
| APX activity                               | 7.26          | 2.56        | 0.65 |
| Proline                                    | 70.23         | 35.40       | 0.50 |
| Malondialdehyde                            | 50.22         | 15.87       | 0.68 |
| Mean value                                 | 0.74 ± 0.03 a |             |      |
| Morphological features                     |               |             |      |
| Leaf area                                  | 764.65        | 14.46       | 0.98 |
| Stalk diameter                             | 34.06         | 18.99       | 0.44 |
| Plant height                               | 193.13        | 51.15       | 0.74 |
| Mean value                                 | 0.72 ± 0.16 a |             |      |
| Anatomical and Ultrastructure features     |               |             |      |
| Adaxial stomatal density                   | 10.14         | 4.00        | 0.61 |
| Abaxial stomatal density                   | 19.02         | 13.37       | 0.30 |
| Adaxial stomatal aperture                  | 6.91          | 2.30        | 0.67 |
| Abaxial stomatal aperture                  | 7.48          | 1.82        | 0.76 |
| Leaf thickness                             | 167.59        | 31.08       | 0.81 |
| Mean value                                 | 0.63 ± 0.09 a |             |      |
